# Supplementary material
Source: Research Square preprint supplement (doi:10.21203/rs.3.rs-9052696/v1)
Supplement: Supplementary file 1 [file b2353bf7a0440b4c585d70d8.docx]

# Supplementary Information

# Lagoons as Ocean Gatekeepers? Seasonal Transport and Retention Dynamics of Floating Macro-debris in the Umgeni River, South Africa

Tadiwanashe Gutsa1, Cristina Trois1,2, and Thomas Mani3,4,*

1 University of Kwazulu-Natal, Durban, South Africa, 2 Stellenbosch University, Stellenbosch, South Africa, 3 The Ocean Cleanup, Rotterdam, The Netherlands, 4 Sustainable Environment Research Institute, Chulalongkorn University, Bangkok, Thailand, * Corresponding Author

## Corresponding author:

Email: t.mani@theoceancleanup.com

## Supplementary Tables

Table S1: Mann-Whitney U-Test for drifter transport (km day-1) between hydrological phases A–C. (n) shows the number of data points used for each phase.

| **Phase** | **Phase** | **U Statistic** | **Raw**  **p-value** | **Adjusted p-value (FDR)** | | **Significant** |
| --- | --- | --- | --- | --- | --- | --- |
| **A** (n=524) | **B** (n=696) | 156176 | 6.61E-06 | 9.25E- 06 | TRUE | |
| **A** (n=524) | **C**  (n=116) | 19404 | 8.88E-11 | 2.66E-10 | TRUE | |
| **B** (n=696) | **C**  (n=116) | 30251.5 | 9.25E-06 | 9.25E-06 | TRUE | |

Table S2: Mann-Whitney U-Test for drifter retention (counts) between hydrological phases (A–C). (n) shows the number of data points used for each phase.

| **Phase** | **Phase** | **U Statistic** | **Raw**  **p-value** | **Adjusted p-value (FDR)** | **Significant** |
| --- | --- | --- | --- | --- | --- |
| **A** (n=83) | **B** (n=123) | 5049 | 0.86 | 0.86 | FALSE |
| **A** (n=83) | **C** (n=55) | 2076.5 | 0.25 | 0.37 | FALSE |
| **B** (n=123) | **C** (n=55) | 3094 | 0.25 | 0.37 | FALSE |

Table 3: Mann-Whitney U-Test for the duration of drifter retention episodes (hours) between hydrological phases (A–C). (n) shows the number of data points used for each phase.

| **Phase** | **Phase** | **U Statistic** | **Raw**  **p-value** | **Adjusted p-value (FDR)** | **Significant** |
| --- | --- | --- | --- | --- | --- |
| **A** (n=113) | **B** (n=160) | 8931 | 0.87 | 0.87 | FALSE |
| **A** (n=113) | **C** (n=82) | 5934.5 | 8.25E -04 | 1.24 E-03 | TRUE |
| **B** (n=160) | **C** (n=82) | 8786 | 1.58E-05 | 4.73E-05 | TRUE |

Table S4: Timeline and descriptive statistics of hydrological phases considered for drifter deployments.

| **Descriptive Measure** | **Phase A (June -September 2022)** | **Phase B (October-January 2022-2023)** | **Phase C (February-May 2023)** |
| --- | --- | --- | --- |
| Total Rainfall (mm) | 86.6 | 500.4 | 329.6 |
| Rainy Days (#) | 16 | 44 | 30 |
| Mean Daily Rainfall | 0.71 | 4.07 | 2.74 |
| Rainfall Intensity | 5.41 | 11.37 | 10.99 |
|  | Low rainfall – dry period. | High rainfall – wet period | Moderate rainfall – receding period |

Table S5: Overview of drifter deployment locations across the Umgeni River Lower Catchment.

| River name | Location id | Segment | Distance from river mouth  (km) | Number of drifters | River Width  (m) |
| --- | --- | --- | --- | --- | --- |
| Piesang | 1 | Tributary | 27,954 | 2 | 11 |
| Piesang | 2 | Tributary | 23,413 | 2 | 38 |
| Umhlangane | 3 | Tributary/main channel | 20,517 | 2 | 20 |
| Umhlangane | 4 | Tributary/main channel | 15,206 | 2 | 38 |
| Umhlangane | 5 | Tributary/main channel | 10,110 | 2 | 27 |
| Umgeni | 6 | Main channel | 2,390 | 2 | 136 |
| Umgeni | 7 | Main channel | 6,487 | 2 | 96 |
| Umgeni | 8 | Main channel | 11,716 | 2 | 45 |
| Umgeni | 9 | Main channel | 18,483 | 2 | 125 |
| Molweni | 10 | Tributary | 22,993 | 1 | 46 |
| Aller | 11 | Tributary | 20,262 | 1 | 12 |
| Palmiet | 12 | Tributary | 11,420 | 2 | 21 |
| Palmiet | 13 | Tributary | 17,491 | 2 | 21 |

Table S6: Descriptive statistics for seasonal daily drifter transport across hydrological phases.

| Phase | Mean  (km day-1). | Median (km day-1). | Max  (km day-1). | Std  (km day-1). | Total  (km) |
| --- | --- | --- | --- | --- | --- |
| A | 0.31 | 0.00 | 17.21 | 1.21 | 159.98 |
| B | 0.28 | 0.02 | 9.16 | 0.82 | 196.66 |
| C | 1.16 | 0.10 | 11.42 | 2.34 | 134.82 |

Table S7: Descriptive statistics for daily retention episodes (counts) per drifter across hydrological phases.

| Phase | Mean | Median | Max | Std | Total |
| --- | --- | --- | --- | --- | --- |
| A | 1.36 | 1 | 5 | 0.75 | 113 |
| B | 1.3 | 1 | 4 | 0.55 | 160 |
| C | 1.49 | 1 | 5 | 0.85 | 82 |

Table S8: Descriptive statistics for the duration (hours) of drifter retention episodes across hydrological phases.

| Phase | Mean | Median | Max | Std | Total |
| --- | --- | --- | --- | --- | --- |
| A | 508.91 | 16.67 | 4796.10 | 1125.95 | 57507.01 |
| B | 230.22 | 48.89 | 7269.27 | 748.25 | 36835.71 |
| C | 40.45 | 5.90 | 274.87 | 71.85 | 3316.91 |

Table S9: Pearson correlation and linear regression results for analysing the relationship between drifter transport and hydrological predictors (rainfall and river level) at varying temporal lags during Phase A.

| **Predictor** | **Lag (days)** | **Pearson r** | **p-value** | **Regression coefficient (β)** | **t-value** | **Regression p-value** | **Model R²** |
| --- | --- | --- | --- | --- | --- | --- | --- |
| Rainfall | 0 | 0.018 | 0.7725 | 0.0023 | 0.963 | 0.3366 | 0.065 |
| Rainfall | 1 | 0.003 | 0.9679 | 0.003 | 1.213 | 0.2264 | 0.065 |
| Rainfall | 2 | 0.058 | 0.3518 | 0.0064 | 2.502 | 0.013 | 0.065 |
| Rainfall | 3 | -0.001 | 0.9866 | 0.0034 | 1.044 | 0.2974 | 0.065 |
| River level | 0 | -0.124 | 0.0463 | -0.2365 | -1.34 | 0.1816 | 0.065 |
| River level | 1 | -0.144 | 0.0211 | -0.2029 | -1.055 | 0.2925 | 0.065 |
| River level | 2 | -0.161 | 0.0099 | -0.2263 | -1.184 | 0.2374 | 0.065 |
| River level | 3 | -0.153 | 0.0139 | -0.0591 | -0.355 | 0.7232 | 0.065 |

Table S10: Pearson correlation and linear regression results for analysing the relationship between drifter transport and hydrological predictors (rainfall and river level) at varying temporal lags during Phase B.

| **Predictor** | **Lag (days)** | **Pearson r** | **p-value** | **Regression coefficient (β)** | **t-value** | **Regression p-value** | **Model R²** |
| --- | --- | --- | --- | --- | --- | --- | --- |
| Rainfall | 0 | 0.176 | 0.0136 | 0.005 | 2.421 | 0.0164 | 0.048 |
| Rainfall | 1 | 0.047 | 0.5103 | 0.0014 | 0.696 | 0.4872 | 0.048 |
| Rainfall | 2 | -0.045 | 0.534 | 0.00001 | 0.024 | 0.981 | 0.048 |
| Rainfall | 3 | -0.039 | 0.5852 | 0.0002 | 0.098 | 0.9223 | 0.048 |
| River level | 0 | -0.03 | 0.6794 | -0.096 | -0.599 | 0.5498 | 0.048 |
| River level | 1 | -0.085 | 0.2387 | -0.0344 | -0.185 | 0.8534 | 0.048 |
| River level | 2 | -0.114 | 0.1117 | -0.1092 | -0.59 | 0.5559 | 0.048 |
| River level | 3 | -0.084 | 0.2445 | -0.0051 | -0.033 | 0.9738 | 0.048 |

Table S11: Pearson correlation and linear regression results for analysing the relationship between drifter transport and hydrological predictors (rainfall and river level) at varying temporal lags during Phase C.

| **Predictor** | **Lag (days)** | **Pearson r** | **p-value** | **Regression coefficient (β)** | **t-value** | **Regression p-value** | **Model R²** |
| --- | --- | --- | --- | --- | --- | --- | --- |
| Rainfall | 0 | 0.841 | 0.0006 | 0.0451 | 1.438 | 0.2461 | 0.889 |
| Rainfall | 1 | -0.065— | 0.8416— | -0.057— | -1.51— | 0.2282— | 0.889— |
| Rainfall | 2 | -0.068 | 0.8327 | -0.0039 | -0.116 | 0.9153 | 0.889 |
| Rainfall | 3 | 0.153 | 0.6349 | -0.0117 | -0.299 | 0.7841 | 0.889 |
| River level | 0 | 0.527 | 0.0785 | 3.0206 | 1.169 | 0.3267 | 0.889 |
| River level | 1 | 0.106 | 0.7427 | -0.6047 | -0.212 | 0.8459 | 0.889 |
| River level | 2 | -0.221 | 0.4897 | -0.2266 | -0.093 | 0.9321 | 0.889 |
| River level | 3 | -0.307 | 0.3324 | 0.7603 | 0.428 | 0.6974 | 0.889 |

## Supplementary figures


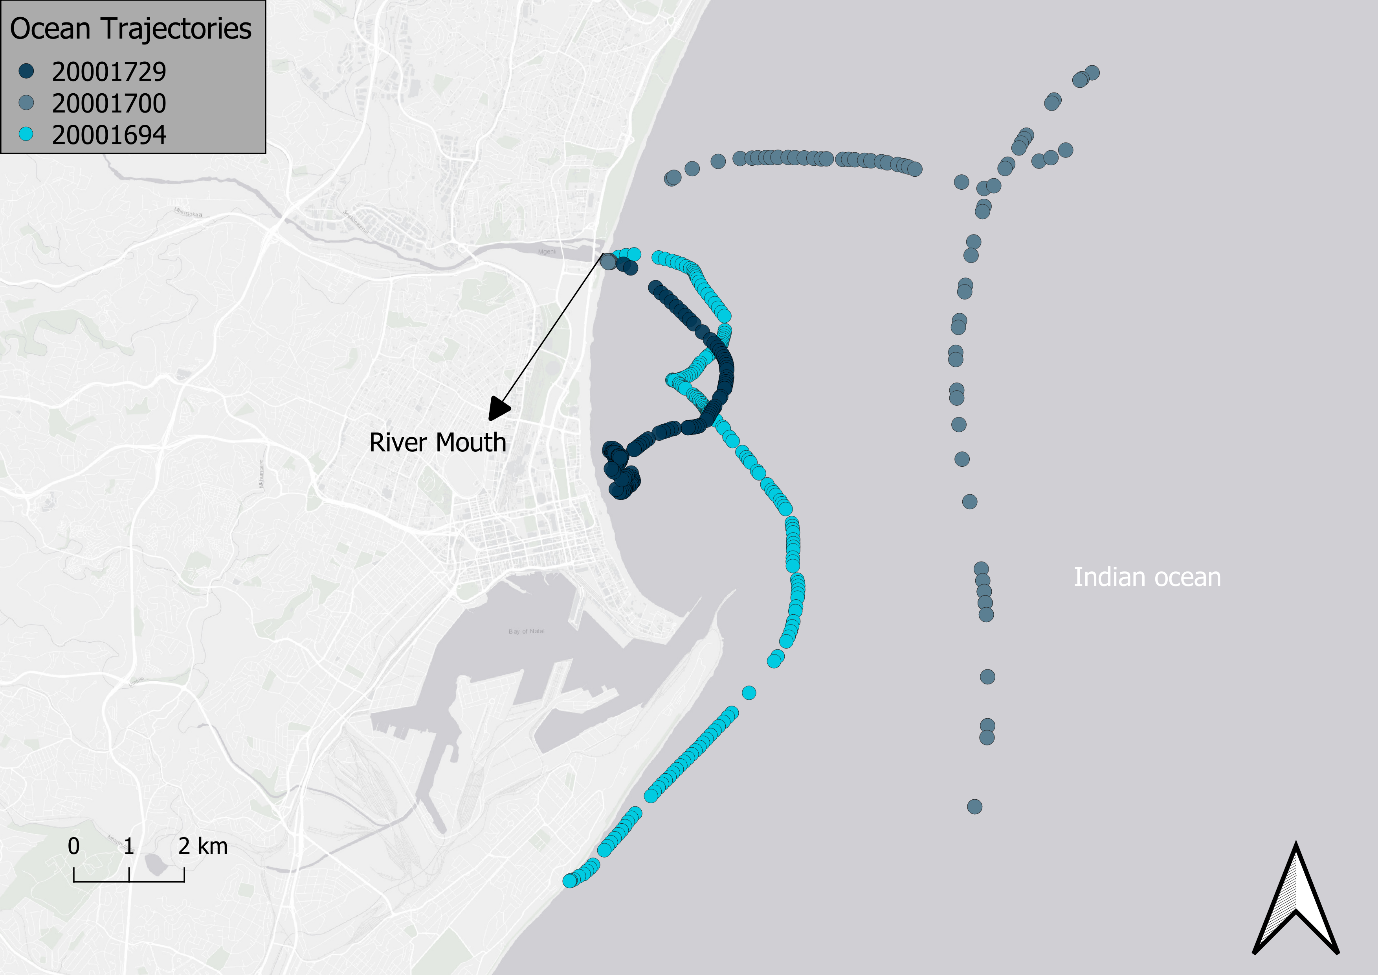


Figure S1: Trajectories of GPS-trackers that drifted into the open ocean, highlighting the transport pathways after existing the estuary.


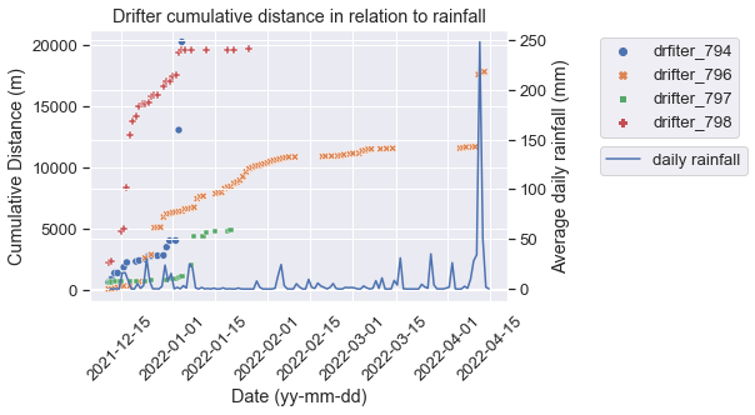


Figure S2: Pilot study conducted before the main experiment showing the high transport impact of the 1:50–100 year return period flood of April 2022.
